# Supplementary material
Source: bioRxiv or medRxiv preprint supplement (http://www.biorxiv.org/highwire/filestream/9903/field_highwire_adjunct_files/0/036905-1.pdf)
Supplement: Supplementary file [file 036905-1.pdf]

## Supplementary Material

S1 Table. Statistics for one-way simulation ANOVAs on accuracy threshold

| Simulation                          | Stimulation Condition |           |          |            |
|-------------------------------------|-----------------------|-----------|----------|------------|
|                                     | <i>F</i>              | <i>df</i> | <i>p</i> | $\eta_p^2$ |
| Base model                          | 1.597                 | 2, 38     | 0.216    | 0.078      |
| Total mean input firing rates=40Hz  | 2.039                 | 2, 38     | 0.144    | 0.097      |
| Total mean input firing rates=120Hz | 7.885                 | 2, 38     | 0.001    | 0.293      |
| Update frequency=30Hz               | 11.121                | 2, 38     | <0.001   | 0.369      |
| Update frequency=120Hz              | 6.314                 | 2, 38     | 0.004    | 0.249      |
| tDCS of pyramidal cells only        | 5.676                 | 2, 38     | 0.007    | 0.230      |

S2 Table. Statistics for two-way simulation ANOVAs on decision time

| Simulation                          | Stimulation Condition |                  |          |            |               | Coherence |                  |          |            |               | Stimulation Condition × Coherence |                   |          |            |               |
|-------------------------------------|-----------------------|------------------|----------|------------|---------------|-----------|------------------|----------|------------|---------------|-----------------------------------|-------------------|----------|------------|---------------|
|                                     | <i>F</i>              | <i>df</i>        | <i>p</i> | $\eta_p^2$ | $\varepsilon$ | <i>F</i>  | <i>df</i>        | <i>p</i> | $\eta_p^2$ | $\varepsilon$ | <i>F</i>                          | <i>df</i>         | <i>p</i> | $\eta_p^2$ | $\varepsilon$ |
| Base model                          | 136.264               | 2, 38            | <0.001   | 0.878      |               | 354.571   | 2.792,<br>53.044 | <0.001   | 0.949      | 0.465         | 6.702                             | 6.176,<br>117.346 | <0.001   | 0.261      | 0.515         |
| Total mean input firing rates=40Hz  | 158.063               | 1.351,<br>25.676 | <0.001   | 0.893      | 0.676         | 185.935   | 2.431,<br>46.185 | <0.001   | 0.907      | 0.405         | 6.834                             | 6.453,<br>122.603 | <0.001   | 0.265      | 0.538         |
| Total mean input firing rates=120Hz | 78.561                | 2, 38            | <0.001   | 0.805      |               | 311.128   | 3.157,<br>59.989 | <0.001   | 0.942      | 0.526         | 6.861                             | 5.756,<br>109.360 | <0.001   | 0.265      | 0.480         |
| Update frequency=30Hz               | 118.621               | 2, 38            | <0.001   | 0.862      |               | 307.404   | 3.409,<br>64.778 | <0.001   | 0.942      | 0.568         | 6.013                             | 6.001,<br>114.017 | <0.001   | 0.240      | 0.500         |
| Update frequency=120Hz              | 128.579               | 2, 38            | <0.001   | 0.871      |               | 372.423   | 2.853,<br>54.207 | <0.001   | 0.951      | 0.476         | 7.704                             | 6.509,<br>123.679 | <0.001   | 0.289      | 0.542         |
| tDCS of pyramidal cells only        | 65.290                | 2, 38            | <0.001   | 0.775      |               | 312.197   | 2.912,<br>55.331 | <0.001   | 0.943      | 0.485         | 2.002                             | 5.527,<br>105.017 | 0.077    | 0.095      | 0.461         |

S3 Table. Statistics for two-way simulation ANOVAs on decision time difference

| Simulation                          | Stimulation Condition |           |          |            |               | Coherence |                  |          |            |               | Stimulation Condition × Coherence |                  |          |            |               |
|-------------------------------------|-----------------------|-----------|----------|------------|---------------|-----------|------------------|----------|------------|---------------|-----------------------------------|------------------|----------|------------|---------------|
|                                     | <i>F</i>              | <i>df</i> | <i>P</i> | $\eta_p^2$ | $\varepsilon$ | <i>F</i>  | <i>df</i>        | <i>p</i> | $\eta_p^2$ | $\varepsilon$ | <i>F</i>                          | <i>df</i>        | <i>p</i> | $\eta_p^2$ | $\varepsilon$ |
| Base model                          | 276.864               | 1, 19     | <0.001   | 0.936      |               | 0.437     | 2.457,<br>46.674 | 0.689    | 0.022      | 0.409         | 49.526                            | 2.607,<br>49.526 | <0.001   | 0.722      | 0.434         |
| Total mean input firing rates=40Hz  | 182.088               | 1, 19     | <0.001   | 0.906      |               | 0.285     | 1.944,<br>36.927 | 0.747    | 0.015      | 0.324         | 28.765                            | 2.441,<br>46.395 | <0.001   | 0.602      | 0.407         |
| Total mean input firing rates=120Hz | 164.270               | 1, 19     | <0.001   | 0.896      |               | 0.266     | 2.668,<br>50.698 | 0.827    | 0.014      | 0.445         | 40.003                            | 2.076,<br>39.443 | <0.001   | 0.678      | 0.346         |
| Update frequency=30Hz               | 232.766               | 1, 19     | <0.001   | 0.925      |               | 0.785     | 2.662,<br>50.579 | 0.494    | 0.040      | 0.444         | 44.330                            | 2.881,<br>54.730 | <0.001   | 0.700      | 0.480         |
| Update frequency=120Hz              | 412.874               | 1, 19     | <0.001   | 0.956      |               | 1.307     | 2.734,<br>51.946 | 0.379    | 0.052      | 0.456         | 42.764                            | 1.738,<br>33.019 | <0.001   | 0.692      | 0.290         |
| tDCS of pyramidal cells only        | 121.998               | 1, 19     | <0.001   | 0.865      |               | 2.381     | 2.605,<br>49.502 | 0.089    | 0.111      | 0.434         | 10.586                            | 2.548,<br>48.413 | <0.001   | 0.358      | 0.425         |

S4 Table. Statistics for one-way simulation ANOVAs on pre-stimulus bias

| Simulation                          | Stimulation Condition |           |          |            |
|-------------------------------------|-----------------------|-----------|----------|------------|
|                                     | <i>F</i>              | <i>df</i> | <i>p</i> | $\eta_p^2$ |
| Base model                          | 77.174                | 2, 38     | <0.001   | 0.802      |
| Total mean input firing rates=40Hz  | 79.851                | 2, 38     | <0.001   | 0.808      |
| Total mean input firing rates=120Hz | 111.214               | 2, 38     | <0.001   | 0.854      |
| Update frequency=30Hz               | 108.569               | 2, 38     | <0.001   | 0.851      |
| Update frequency=120Hz              | 84.059                | 2, 38     | <0.001   | 0.816      |
| tDCS of pyramidal cells only        | 37,064                | 2, 38     | <0.001   | 0.661      |

S5 Table. Statistics for one-way simulation ANOVAs on pre-stimulus bias – choice percentage steepness

|                                     | Stimulation Condition |                  |          |            |               |
|-------------------------------------|-----------------------|------------------|----------|------------|---------------|
| Simulation                          | <i>F</i>              | <i>df</i>        | <i>p</i> | $\eta_p^2$ | $\varepsilon$ |
| Base model                          | 1.129                 | 2, 38            | 0.334    | 0.056      |               |
| Total mean input firing rates=40Hz  | 0.596                 | 2, 38            | 0.556    | 0.030      |               |
| Total mean input firing rates=120Hz | 1.848                 | 2, 38            | 0.171    | 0.089      |               |
| Update frequency=30Hz               | 0.778                 | 1.477,<br>28.054 | 0.433    | 0.039      | 0.738         |
| Update frequency=120Hz              | 2.534                 | 1.267,<br>24.071 | 0.118    | 0.118      | 0.633         |
| tDCS of pyramidal cells only        | 1.400                 | 1.443,<br>27.409 | 0.258    | 0.069      | 0.721         |

S6 Table. Statistics for one-way simulation ANOVAs on pre-stimulus bias – decision time slope and offset

| Simulation                          | Slope: Stimulation Condition |                  |          |            |               | Offset: Stimulation Condition |           |          |            |
|-------------------------------------|------------------------------|------------------|----------|------------|---------------|-------------------------------|-----------|----------|------------|
|                                     | <i>F</i>                     | <i>df</i>        | <i>p</i> | $\eta_p^2$ | $\varepsilon$ | <i>F</i>                      | <i>df</i> | <i>p</i> | $\eta_p^2$ |
| Base model                          | 1.050                        | 1.497,<br>28.442 | 0.344    | 0.052      | 0.748         | 9.012                         | 2, 38     | 0.001    | 0.322      |
| Total mean input firing rates=40Hz  | 1.335                        | 1.417,<br>26.915 | 0.272    | 0.066      | 0.708         | 39.596                        | 2, 38     | <0.001   | 0.676      |
| Total mean input firing rates=120Hz | 0.320                        | 1.332,<br>25.307 | 0.640    | 0.017      | 0.666         | 14.307                        | 2, 38     | <0.001   | 0.430      |
| Update frequency=30Hz               | 2.303                        | 1.154,<br>21.926 | 0.141    | 0.108      | 0.577         | 7.507                         | 2, 38     | 0.002    | 0.283      |
| Update frequency=120Hz              | 1.394                        | 1.291,<br>24.534 | 0.258    | 0.068      | 0.646         | 12.803                        | 2, 38     | <0.001   | 0.403      |
| tDCS of pyramidal cells only        | 2.421                        | 1.084,<br>20.593 | 0.133    | 0.113      | 0.542         | 6.268                         | 2, 38     | 0.004    | 0.248      |
